# Supplementary material for: Deaggregation and Crystallization Inhibition by Small Amount of Polymer Addition for a Co-Amorphous Curcumin-Magnolol System
Source: MDPI journal article supplement (doi:10.3390/pharmaceutics13101725), 2021-10-18
Supplement: s1 [file s1]

# Supplementary Materials: Deaggregation and Crystallization Inhibition by Small Amount of Polymer Addition for a Co-Amorphous Curcumin-Magnolol System

Jiawei Han, Luyuan Li, Meiling Su, Weili Heng, Yuanfeng Wei, Yuan Gao and Shuai Qian

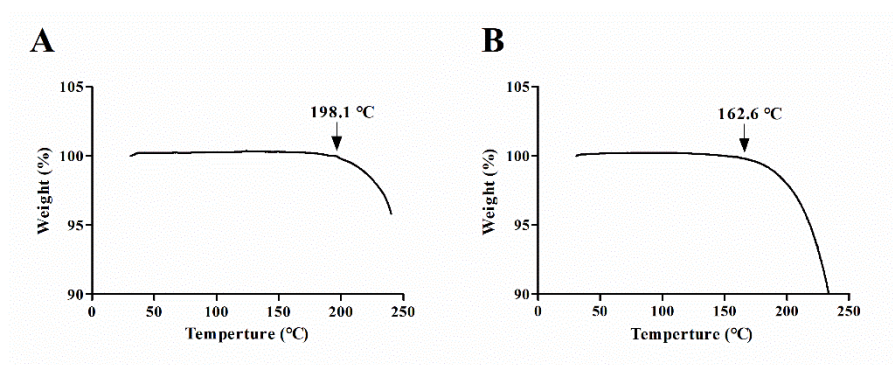

**Figure S1.** TGA charts of crystalline CUR (A) and crystalline MAG (B).

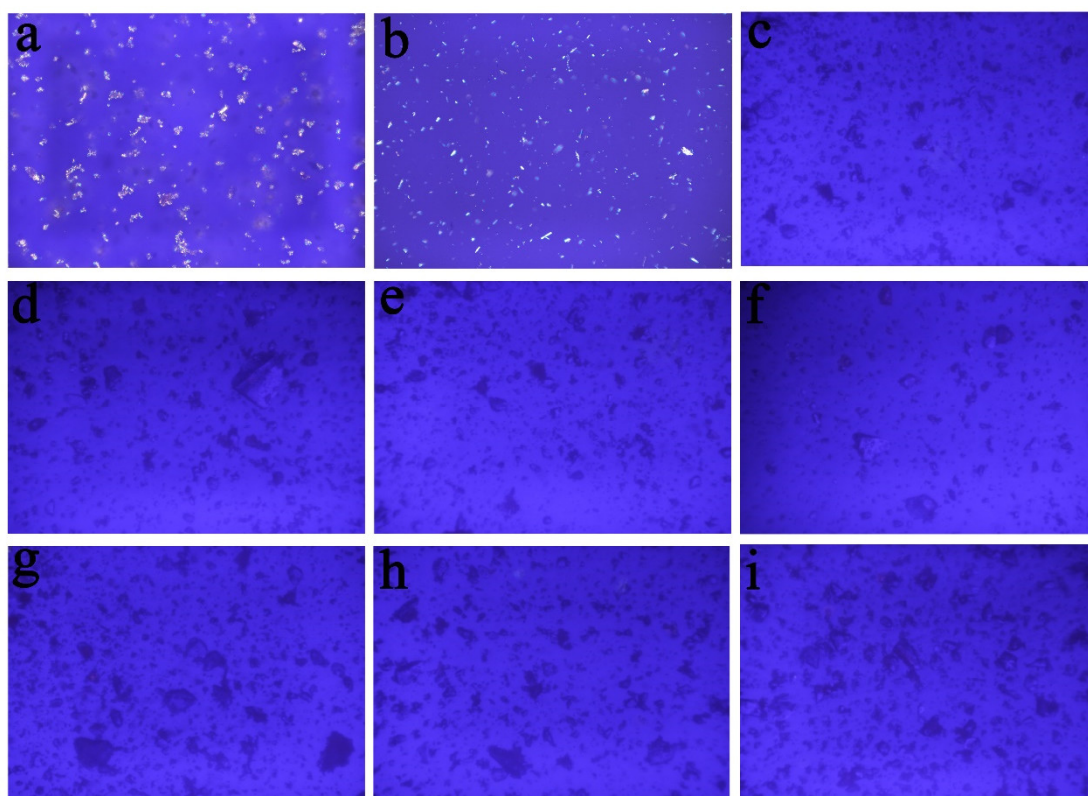

**Figure S2.** PLM photographs of (a) crystalline CUR, (b) crystalline MAG, (c) CUR-MAG CM, (d) CUR-MAG-HPMC CM, (e) CUR-MAG-HPC CM, (f) CUR-MAG-PVP K30 CM, (g) CUR-MAG-MCC CM, (h) CUR-MAG-VA64 CM and (i) CUR-MAG-S630 CM.

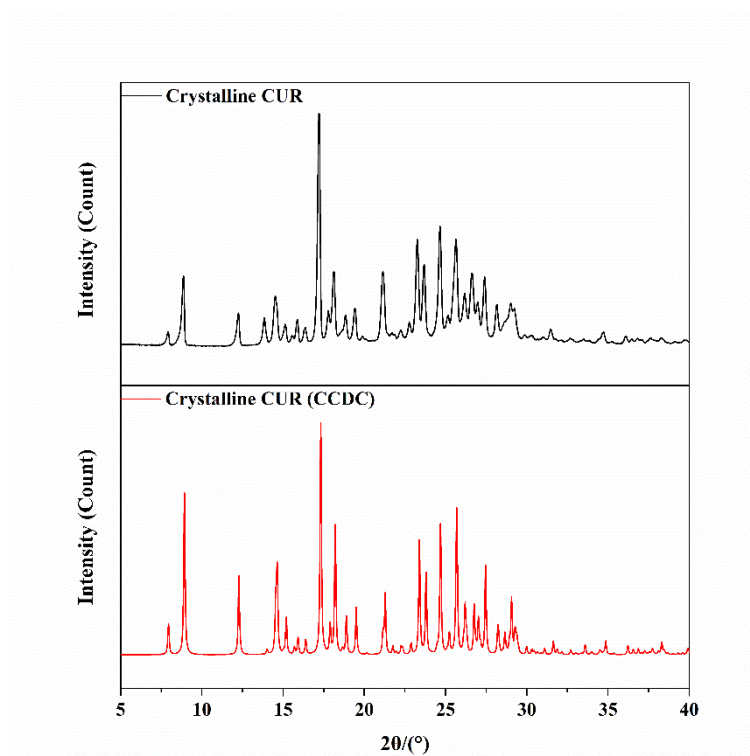

**Figure S3.** Comparison of the experimental pattern of crystalline CUR with the standard pattern from the Cambridge Crystallographic Data Centre.

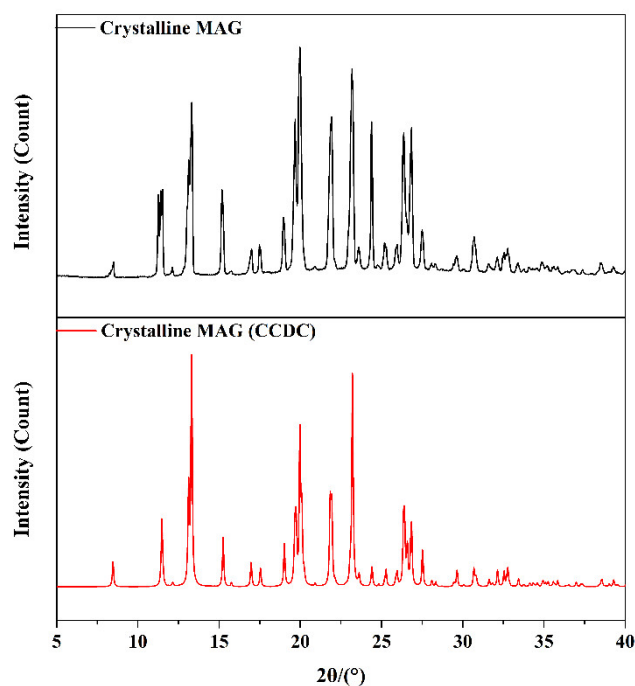

**Figure S4.** Comparison of the experimental pattern of crystalline MAG with the standard pattern from the Cambridge Crystallographic Data Centre.

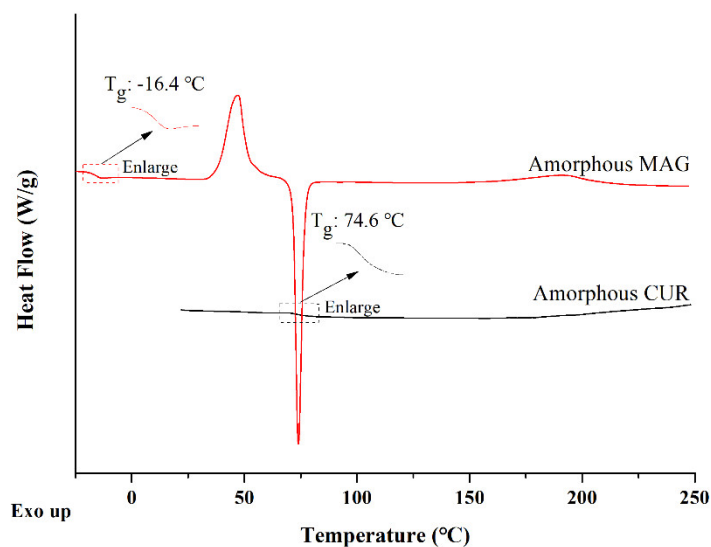

**Figure S5.** DSC thermograms of amorphous CUR and amorphous MAG prepared *in situ* using differential scanning calorimetry.

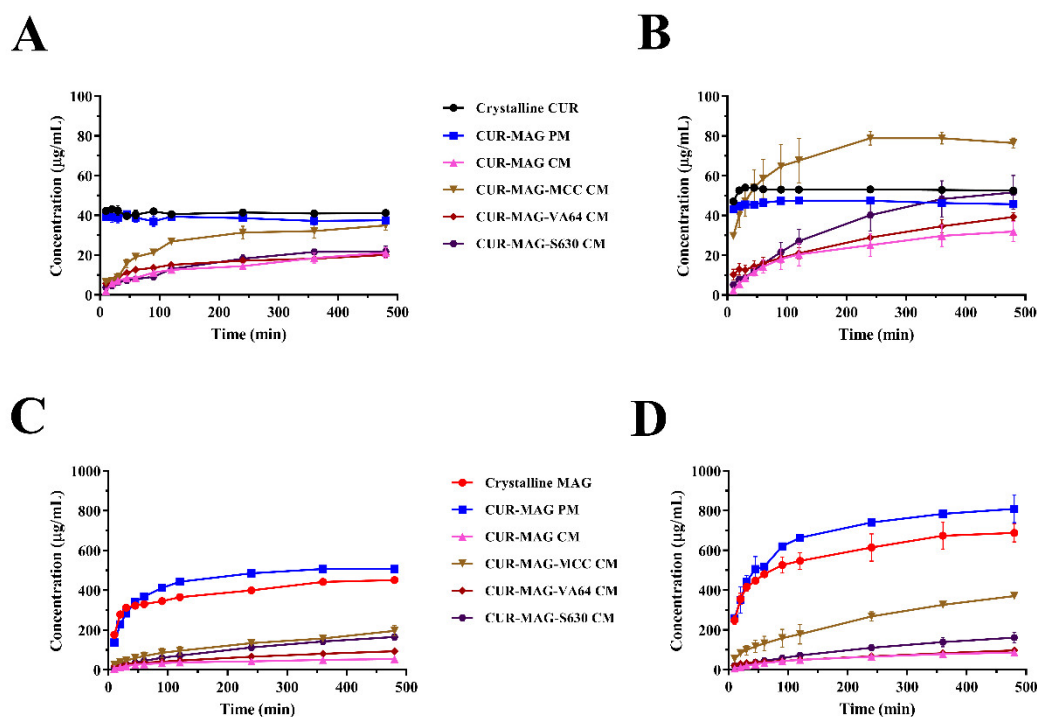

**Figure S6.** *In vitro* concentration - time profiles of CUR determined in (A) HCl buffer (pH = 1.2) and (B) phosphate buffer (pH = 6.8), and *in vitro* concentration - time profiles of MAG determined in (C) HCl buffer (pH = 1.2) and (D) phosphate buffer (pH = 6.8) for the dissolution of CUR-MAG-MCC CM, CUR-MAG-VA64 and CUR-MAG-S630 CM.

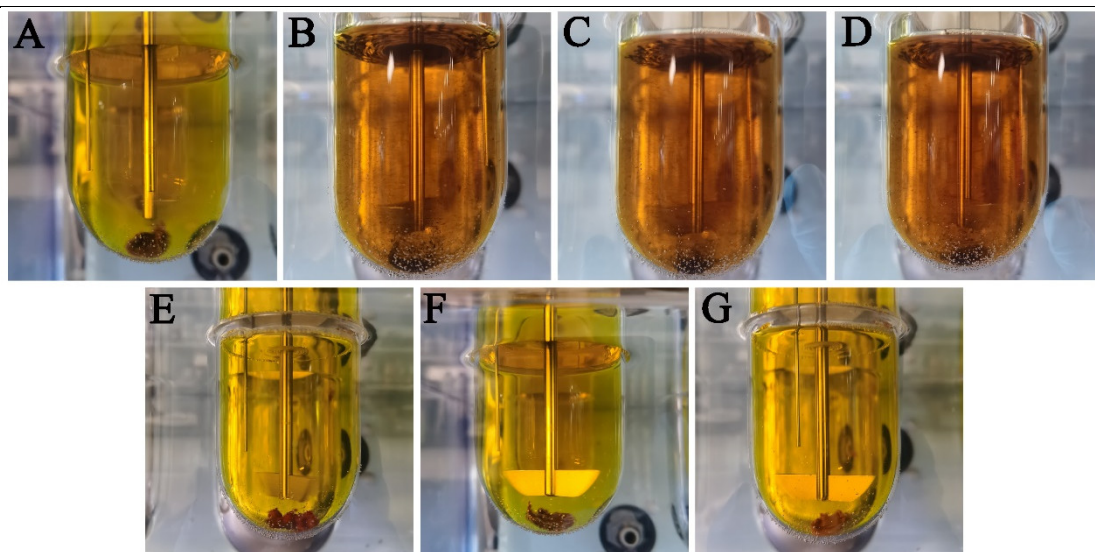

**Figure S7.** Photographs of (A) CUR-MAG CM, (B) CUR-MAG-HPMC CM, (C) CUR-MAG-HPC CM, (D) CUR-MAG-PVP K30 CM, (E) CUR-MAG-MCC CM, (F) CUR-MAG-VA64 CM and (G) CUR-MAG-S630 CM during dissolution at 240 min in pH 6.8 phosphate buffer.

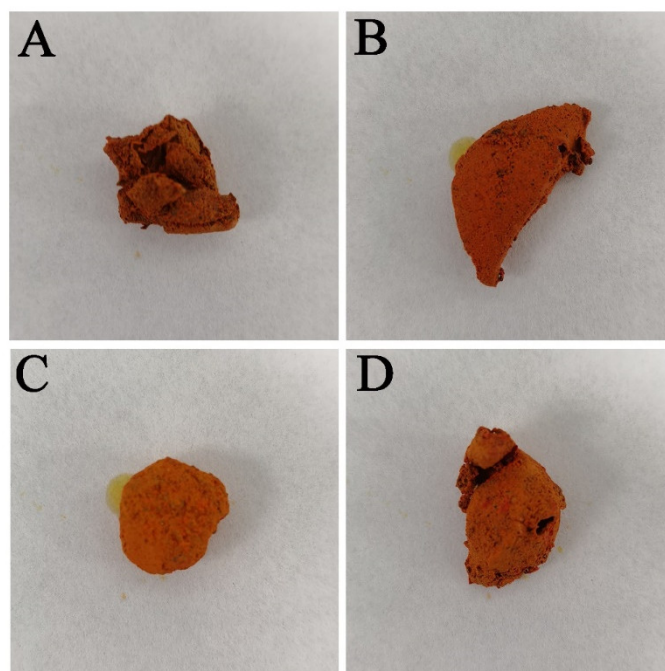

**Figure S8.** Photographs of (A) CUR-MAG CM, (B) CUR-MAG-MCC CM, (C) CUR-MAG-VA64 CM and (D) CUR-MAG-S630 CM after dissolution in pH 6.8 phosphate buffer.



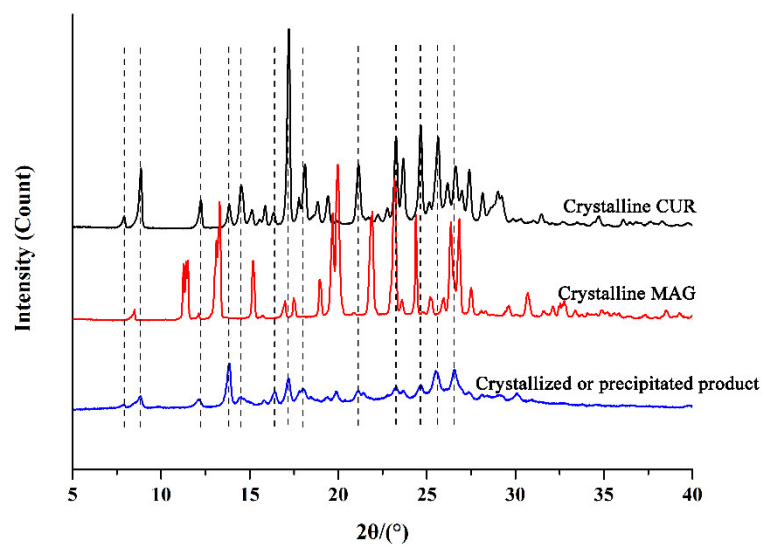

**Figure S9.** Comparison of the XRPD patterns between the precipitated product and crystalline CUR/MAG.

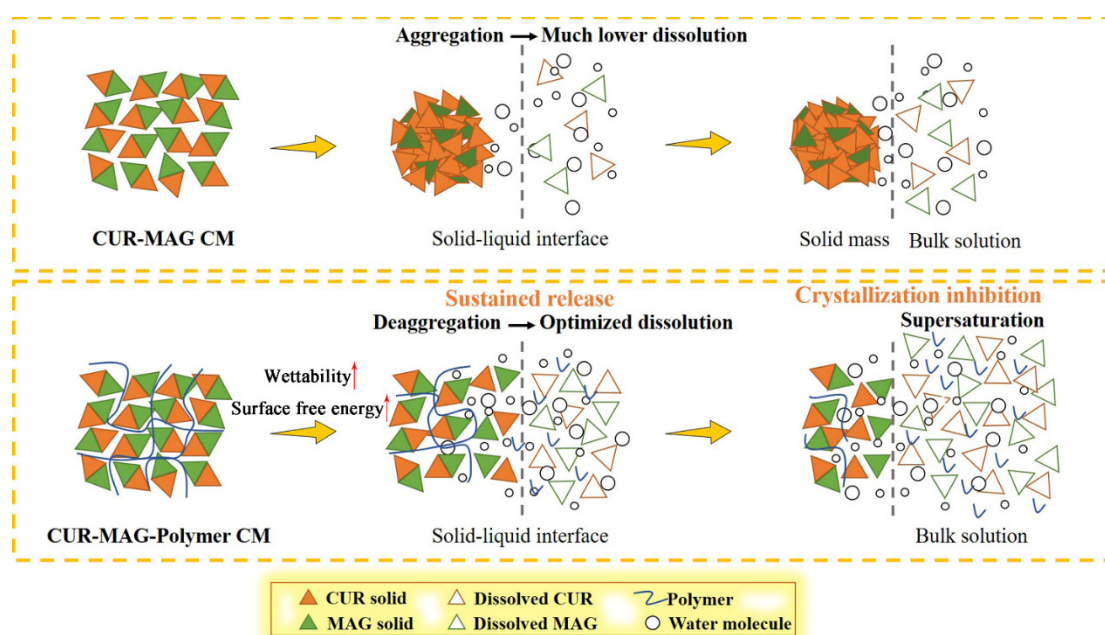

**Figure S10.** Proposed mechanism of deaggregation and crystallization inhibition by polymer addition in improving the dissolution of CUR-MAG CM.

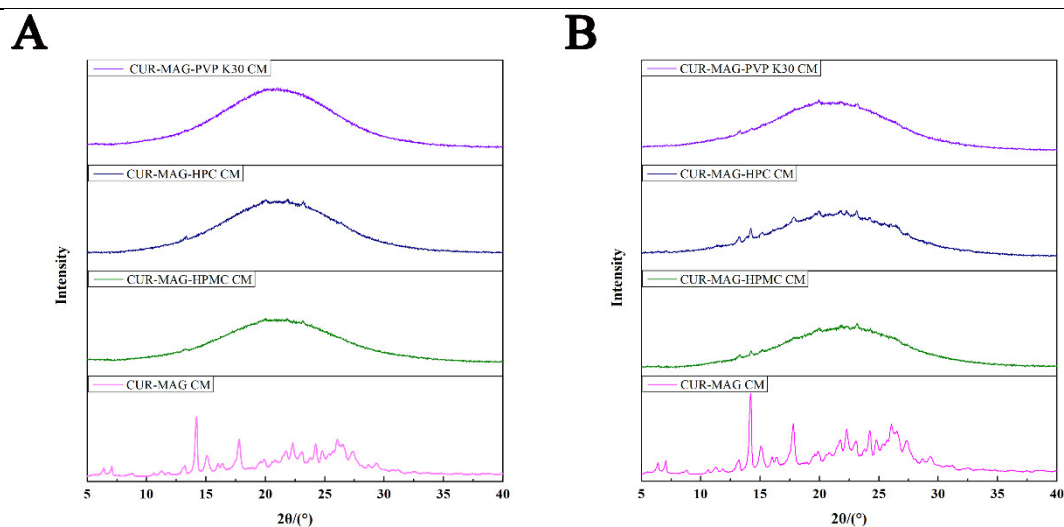

**Figure S11.** XRPD diffractograms of CUR-MAG CM, CUR-MAG-HPMC CM, CUR-MAG-HPC CM and CUR-MAG-PVP K30 CM during dissolution in pH 6.8 phosphate buffer at (A) 240 min and (B) 480 min.

**Table S1.** Theoretical calculation of solubility parameters.

| Components | $\delta$ (MPa <sup>1/2</sup> ) |                               |                                     | $\Delta\delta$ (MPa <sup>1/2</sup> ) |
|------------|--------------------------------|-------------------------------|-------------------------------------|--------------------------------------|
|            | Fedors method                  | Hofsteyer-Van Krevelen method | Mean $\delta$ (MPa <sup>1/2</sup> ) |                                      |
| CUR        | 22.82                          | 26.33                         | 24.58                               | 0.41                                 |
| MAG        | 21.09                          | 27.24                         | 24.17                               |                                      |
| HPMC       | 21.05                          | 24.63                         | 22.84                               | 1.74                                 |
| HPC        | 25.84                          | 28.22                         | 27.03                               | 2.45                                 |
| PVP K30    | 23.81                          | 21.81                         | 22.81                               | 1.77                                 |
| MCC        | 25.96                          | 29.92                         | 27.94                               | 3.36                                 |
| VA64       | 18.44                          | 19.58                         | 19.01                               | 5.57                                 |
| S630       | 19.04                          | 20.79                         | 19.92                               | 4.66                                 |

**Table S2.** The yields of CUR-MAG CM and its ternary co-amorphous systems.

| Samples | CUR-MAG CM    | CUR-MAG-HPMC CM | CUR-MAG-HPC CM | CUR-MAG-PVP K30 CM |
|---------|---------------|-----------------|----------------|--------------------|
| Yield   | 98.15 ± 0.74% | 97.84 ± 1.43%   | 97.36 ± 1.92%  | 98.01 ± 0.80%      |

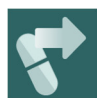**Table S3.** Resonance assignments of CUR and MAG in  $^{13}\text{C}$  NMR spectra in solid state.

| Compound | Carbon Number | Chemical shift (ppm) |
|----------|---------------|----------------------|
| CUR      | 12, 15        | 185.69, 181.23       |
|          | 1, 2, 21, 22  | 147.07               |
|          | 10, 18        | 138.83               |
|          | 11, 17        | 128.11               |
|          | 5, 19         | 123.92               |
|          | 4, 24         | 121.43               |
|          | 3, 23         | 113.56               |
|          | 6, 20         | 108.50               |
|          | 8, 26         | 55.98                |
|          | 14            | 54.00                |
| MAG      | 1, 9          | 148.91               |
|          | 15, 19        | 136.72               |
|          | 4, 12         | 134.18               |
|          | 3, 13         | 130.87               |
|          | 5, 11         | 128.20               |
|          | 2, 8          | 124.47               |
|          | 6, 10, 16, 20 | 114.11               |
|          | 14, 18        | 39.73, 36.14         |

**Table S4.** Kinetic parameters including maximum concentration of dissolved drug ( $C_{\max}$ ) and area under dissolution curve (AUDC) determined from the drug dissolution profiles.

| Samples            | Measured component | $C_{\max}$ ( $\mu\text{g/mL}$ ) | AUDC (pH 1.2) ( $\text{min}\cdot\mu\text{g/mL}$ ) | Relative percentage of AUDC | $C_{\max}$ ( $\mu\text{g/mL}$ ) | AUDC (pH 6.8) ( $\text{min}\cdot\mu\text{g/mL}$ ) | Relative percentage of AUDC |
|--------------------|--------------------|---------------------------------|---------------------------------------------------|-----------------------------|---------------------------------|---------------------------------------------------|-----------------------------|
| Crystalline CUR    | CUR                | $43.15 \pm 1.35$                | $19346 \pm 171$                                   | 100%                        | $54.04 \pm 0.39$                | $24889 \pm 98$                                    | 100%                        |
| CUR-MAG PM         |                    | $40.59 \pm 1.80$                | $17977 \pm 233$                                   | 93%                         | $47.45 \pm 1.38$                | $21926 \pm 218^*$                                 | 88%                         |
| CUR-MAG CM         |                    | $21.17 \pm 2.58^{**}$           | $6988 \pm 277^{**}$                               | 36%                         | $31.98 \pm 5.08^{**}$           | $11260 \pm 825^{**}$                              | 45%                         |
| CUR-MAG-HPMC CM    |                    | $172.78 \pm 33.87^{**}$         | $71912 \pm 1065^{**}$                             | 372%                        | $194.69 \pm 4.18^{**}$          | $80089 \pm 838^{**}$                              | 322%                        |
| CUR-MAG-HPC CM     |                    | $245.22 \pm 3.41^{**}$          | $100798 \pm 955^{**}$                             | 521%                        | $157.70 \pm 1.48^{**}$          | $67229 \pm 658^{**}$                              | 270%                        |
| CUR-MAG-PVP K30 CM |                    | $169.01 \pm 4.52^{**}$          | $71163 \pm 1121^{**}$                             | 368%                        | $274.47 \pm 3.30^{**}$          | $110655 \pm 1174^{**}$                            | 445%                        |
| Crystalline MAG    | MAG                | $450.96 \pm 7.65$               | $185660 \pm 1484$                                 | 100%                        | $688.23 \pm 45.37$              | $280221 \pm 8968$                                 | 100%                        |
| CUR-MAG PM         |                    | $507.41 \pm 14.02^*$            | $215090 \pm 1833^*$                               | 116%                        | $808.41 \pm 69.58^*$            | $329391 \pm 4602^*$                               | 118%                        |
| CUR-MAG CM         |                    | $54.19 \pm 3.91^{**}$           | $19715 \pm 430^{**}$                              | 11%                         | $86.14 \pm 9.86^{**}$           | $29104 \pm 1321^{**}$                             | 10%                         |
| CUR-MAG-HPMC CM    |                    | $818.57 \pm 138.62^{**}$        | $337443 \pm 13384^{**}$                           | 182%                        | $963.61 \pm 115.29^{**}$        | $366711 \pm 17019^*$                              | 131%                        |
| CUR-MAG-HPC CM     |                    | $1463.76 \pm 27.49^{**}$        | $578949 \pm 4919^{**}$                            | 312%                        | $1095.84 \pm 64.26^{**}$        | $397400 \pm 13842^{**}$                           | 142%                        |
| CUR-MAG-PVP K30 CM |                    | $1255.93 \pm 26.05^{**}$        | $437614 \pm 4670^{**}$                            | 236%                        | $1335.05 \pm 25.79^{**}$        | $500254 \pm 4330^{**}$                            | 179%                        |

Each data represents the mean  $\pm$  the standard deviation ( $n = 3$ ).  $^*p < 0.05$ ,  $^{**}p < 0.01$ , compared to the crystalline drug.



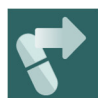

**Table S5.** Values of the Lifshitz-van der Waals ( $\gamma^{LW}$ ) and acid-base ( $\gamma^{AB}$ ) components and electron-acceptor ( $\gamma^+$ ) and electron-donor ( $\gamma^-$ ) parameters of the acid-base component of the surface tension ( $\gamma^{tot}$ ) of the model liquids, used for the surface free energy determination of co-amorphous samples.

| Liquid        | $\gamma^{tot}$ | $\gamma^{LW}$ | $\gamma^{AB}$ | $\gamma^+$ | $\gamma^-$ |
|---------------|----------------|---------------|---------------|------------|------------|
| Water         | 72.8           | 27.0          | 45.8          | 22.9       | 22.9       |
| Glycerol      | 64.0           | 34.0          | 30.0          | 3.92       | 57.4       |
| Diiodomethane | 50.8           | 50.80         |               |            |            |
